# Supplementary material for: Striatal Neurodegeneration that Mimics Huntington’s Disease Modifies GABA-induced Currents
Source: Brain Sci. 2018 Dec 6;8(12):217. doi: 10.3390/brainsci8120217 (PMC6316731; doi:10.3390/brainsci8120217)
Supplement: Supplementary file 1 [file brainsci-08-00217-s001.pdf]

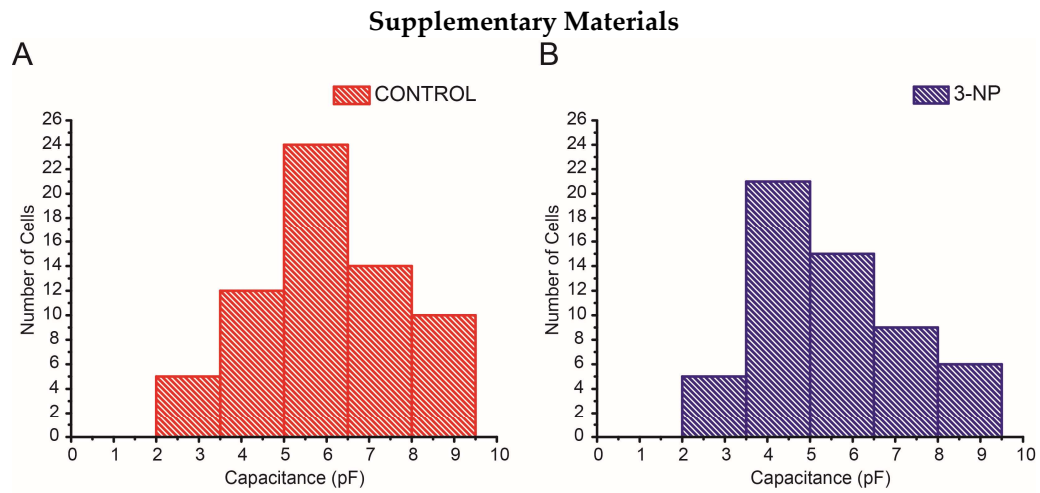

**Figure S1.** Capacitance histogram. **(A)** Frequency histogram for neurons in the control group. The average capacitance was  $6 \pm 0.20$  pF, ( $n = 66$ ). **(B)** Frequency histogram for neurons in the group treated with 3-NP. Capacitance average was  $5.53 \pm 0.25$  pF, ( $n = 59$ )

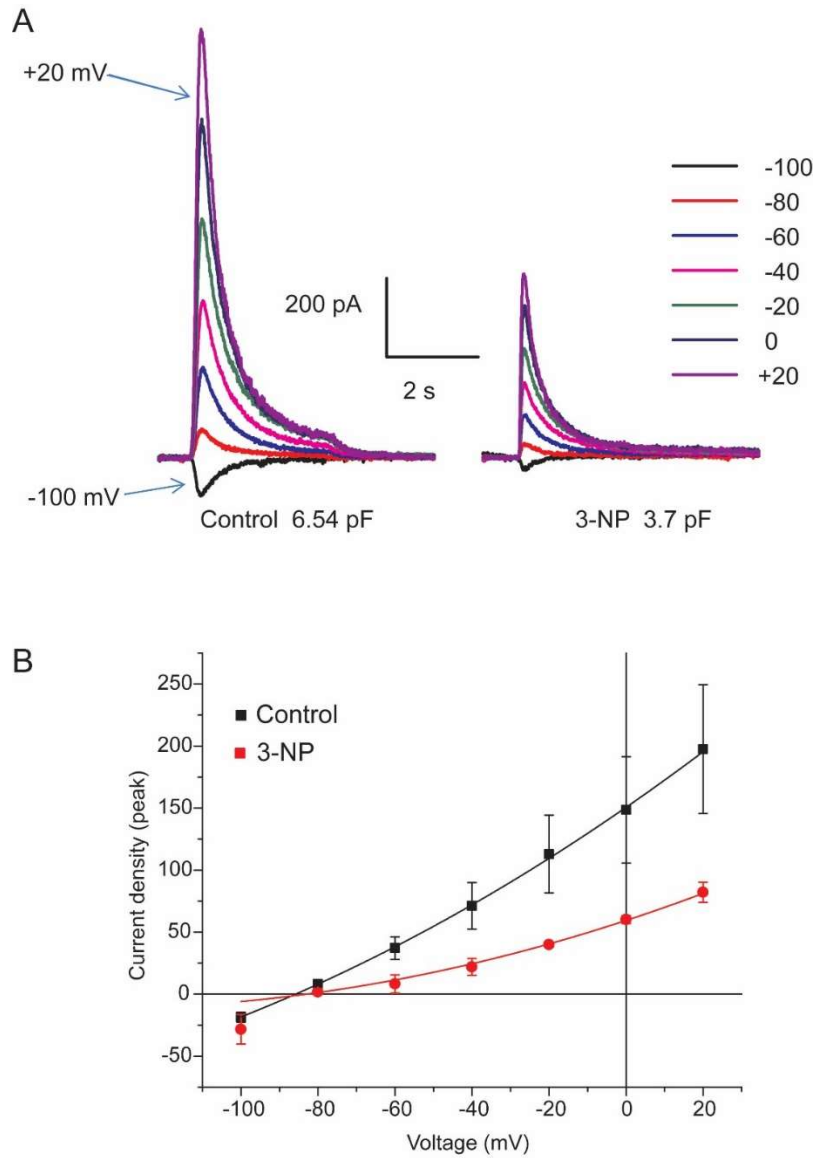

**Figure S2.** Reversal potential for GABA in recorded MSNs. **(A)** Representation of the current-voltage traces in a control group neuron and in a 3-NP group neuron. The current was generated by applying 100  $\mu$ M GABA. The voltages used to generate the currents ranged from -100 mV to +20 mV in voltage steps of 20 mV. Plotted traces are the resulting chloride currents for the different voltages. **(B)** I-V curve of the response to GABA in A. A second-order polynomial was fit to determine the reversal potential in neurons in the control group ( $-84.89 \pm 1.67$ ;  $n = 10$ ) and neurons in the 3-NP group ( $-70.87 \pm 12.96$ ;  $n = 10$ ).

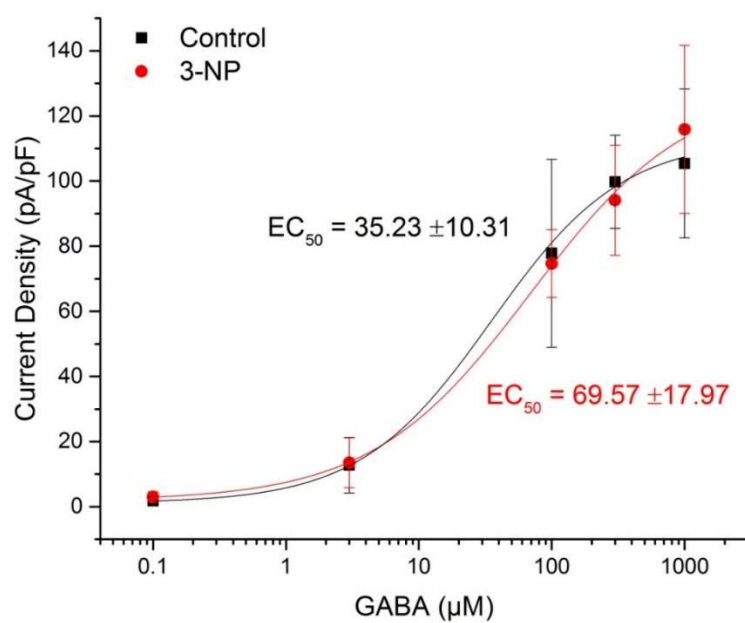

**Figure S3.** Dose response of GABA in cholinergic interneurons. The following GABA concentrations in both the control group and the 3-NP group were used when recording from cholinergic interneurons: 0.1, 3, 30, 100, 300 and 1000  $\mu\text{M}$ .
